# Supplementary material
Source: Springer Nature journal article supplement (https://www.springermedizin.de/resource/supplementary/12936_2010_1593_MOESM1_ESM.pdf/9541502)

A.

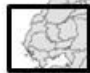

0 100 200 Kilometers

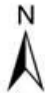

B.

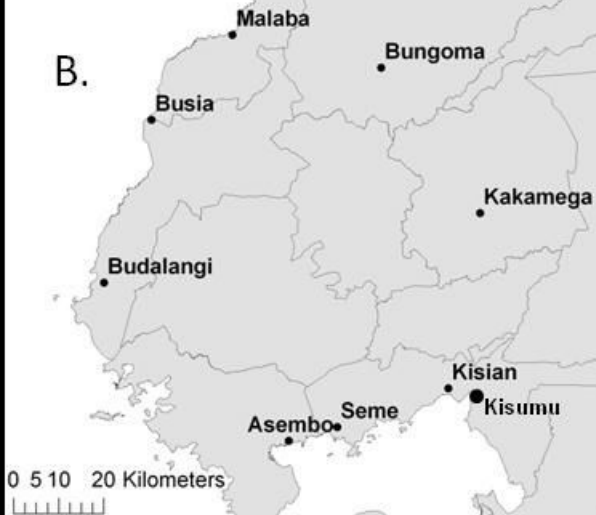

0 5 10 20 Kilometers

Supplement: MOESM1 [file 9541502]
